# Supplementary material for: The broad assessment of HCV genotypes 1 and 3 antigenic targets reveals limited cross-reactivity with implications for vaccine design
Source: PubMed Central journal article supplement (PMC4717358; doi:10.1136/gutjnl-2014-308724), 2015-06-19
Supplement: gutjnl-2014-308724-s1.pdf [file gutjnl-2014-308724-s1.pdf]

|                    |                       | spontaneous resolvers |              | acutely infected |             | chronic patients |              |
|--------------------|-----------------------|-----------------------|--------------|------------------|-------------|------------------|--------------|
| number of patients |                       | 16                    | %            | 16               | %           | 108              | %            |
| sex                | female                | 5                     | <b>31.3</b>  | 7                | <b>43.8</b> | 31               | <b>28.7</b>  |
|                    | male                  | 11                    | <b>68.8</b>  | 9                | <b>56.3</b> | 77               | <b>71.3</b>  |
| Age                | >40                   | 7                     | <b>43.8</b>  | 5                | <b>31.3</b> | 35               | <b>32.4</b>  |
|                    | <40                   | 9                     | <b>56.3</b>  | 11               | <b>68.8</b> | 73               | <b>67.6</b>  |
| Ethnicity          | Caucasian             | 16                    | <b>100.0</b> | 15               | <b>93.8</b> | 87               | <b>80.6</b>  |
|                    | Asian                 |                       |              |                  |             | 16               | <b>14.8</b>  |
|                    | Hispanic              |                       |              | 1                | <b>6.3</b>  | 1                | <b>0.9</b>   |
|                    | not known             |                       |              |                  |             | 4                | <b>3.7</b>   |
| Risk factor        | IVDU                  | 11                    | <b>68.8</b>  | 9                | <b>56.3</b> | 70               | <b>64.8</b>  |
|                    | unkown                | 1                     | <b>6.3</b>   |                  |             | 14               | <b>13.0</b>  |
|                    | BP                    |                       |              | 1                | <b>6.3</b>  | 12               | <b>11.1</b>  |
|                    | cocaine               |                       |              |                  |             | 6                | <b>5.6</b>   |
|                    | tattoo                | 2                     | <b>12.5</b>  | 1                | <b>6.3</b>  | 3                | <b>2.8</b>   |
|                    | needlestick           | 1                     | <b>6.3</b>   |                  |             | 2                | <b>1.9</b>   |
|                    | sexual                | 1                     | <b>6.3</b>   | 5                | <b>31.3</b> | 0                | <b>0.0</b>   |
|                    | vertical              |                       |              |                  |             | 1                | <b>0.9</b>   |
| HCV subtype        | Genotype 3            |                       | N/A          | 8                | <b>50.0</b> | 14               | <b>13.0</b>  |
|                    | Genotype 3a           |                       | N/A          | 8                | <b>50.0</b> | 94               | <b>87.0</b>  |
| Viral load         | IU/ml (mean)          |                       | N/A          | <b>1827490</b>   |             | <b>872828</b>    |              |
|                    | IU/ml (range)         |                       | N/A          | 6290-8930000     |             | 3614-17880410    |              |
| Outcome            | cleared spontaneously | 16                    | <b>100.0</b> | 4                | <b>25.0</b> | 0                | <b>0.0</b>   |
|                    | chronic               | 0                     | <b>0.0</b>   | 10               | <b>62.5</b> | 108              | <b>100.0</b> |
|                    | not treated           | N/A                   |              | 6                | 60.0        | 30               | 27.8         |
|                    | treated               | N/A                   |              | 4                | 40.0        | 78               | 72.2         |
| Treatment          | unkown                |                       |              | 2                | <b>12.5</b> |                  |              |
|                    | SVR                   |                       |              | 2                | <b>50.0</b> | 42               | <b>53.8</b>  |
|                    | REL                   |                       |              | 1                | <b>25.0</b> | 25               | <b>32.1</b>  |
|                    | NR                    |                       |              | 1                | <b>25.0</b> | 6                | <b>7.7</b>   |
|                    | incomplete            |                       |              |                  |             | 3                | <b>3.8</b>   |
|                    | not known             |                       |              |                  |             | 2                | <b>2.6</b>   |

**Table S1: Patient details of patients with spontaneously resolved, acute and chronic HCV genotype-3 infection.**

ID: patient identifier; IVDU: intravenous drug use; BP: blood products; SVR: sustained virological response; REL: viral relapse; NR: treatment non-response.

| ID  | Age | Sex | Race | Risk factor    | GT | HCV VL<br>IU/ml | ALT       | Treatment | outcome                 |
|-----|-----|-----|------|----------------|----|-----------------|-----------|-----------|-------------------------|
| A1  | 23  | F   | W    | Sexual         | 3  | >700000         | 68        | naïve     | cleared spontaneously   |
| A2  | 31  | M   | W    | IVDU           | 3a | 6290            | not known | naïve     | cleared spontaneously   |
| A3  | 23  | M   | W    | IVDU           | 3a | 8930000         | 46        | naïve     | cleared spontaneously   |
| A4  | 21  | M   | W    | IVDU           | 3  | 15900           | 72        | naïve     | cleared spontaneously   |
| A5  | 19  | M   | W    | IVDU           | 3  | 168000          | 229       | naïve     | chronic                 |
| A6  | 20  | F   | W    | IVDU           | 3  | 16100           | 38        | naïve     | chronic                 |
| A7  | 46  | M   | W    | blood exposure | 3  | 204000          | 592       | naïve     | chronic                 |
| A8  | 28  | M   | W    | Sexual         | 3  | 136000          | 698       | naïve     | chronic                 |
| A9  | 45  | F   | W    | Tattoo         | 3a | >700000         | 201       | naïve     | chronic                 |
| A10 | 21  | F   | W    | IVDU           | 3a | 600000          | not known | naïve     | chronic                 |
| A11 | 18  | F   | W    | IVDU           | 3  | 102000          | 88        | naïve     | lost in <6 months       |
| A12 | 25  | F   | W    | IVDU           | 3a | not known       | 21        | naïve     | lost in <6 months       |
| A13 | 40  | F   | W    | Sexual         | 3a | >700000         | 464       | treated   | cleared on Tx           |
| A14 | 41  | M   | H    | Sexual         | 3a | 67535           | 250       | treated   | cleared on Tx           |
| A15 | 49  | M   | W    | Sexual         | 3a | 46603           | 1441      | treated   | cleared on Tx           |
| A16 | 20  | M   | W    | IVDU/Tattoo    | 3  | >700000         | 383       | treated   | chronic (non-responder) |

**Table S2: Patient details acute HCV genotype-3 cohort.**

ID: patient identifier; M: male; F: female; W: white; H: Hispanic; IVDU: intravenous drug use; GT: genotype; ALT: alanine aminotransferase; Tx: treatment.

| Protein | HLA   | Wildtype | Variant   | Amino Acids | Peptide ID                                     | Predicted Epitope                                      |
|---------|-------|----------|-----------|-------------|------------------------------------------------|--------------------------------------------------------|
| NS2     | A0101 | V        | A         | 879-887     | 001-A0101                                      | <b>V</b> ILLT <b>S</b> LLY                             |
|         | A02   | L        | P         | 862-871     | 049-A02                                        | ALQ <b>V</b> WVP <b>P</b> LL                           |
|         |       | L        | P         | 870-879     | 048-A02                                        | LL <b>A</b> RGS <b>R</b> DGV                           |
|         |       | Y        | H         | 881-890     | 052-A02                                        | LL <b>T</b> SLL <b>Y</b> PSL                           |
|         |       | Y        | H         | 885-894     | 047-A02                                        | LL <b>Y</b> PSL <b>I</b> FDI                           |
|         | A0301 | V        | A         | 926-935     | 006-A0301                                      | RLC <b>M</b> L <b>V</b> RS <b>V</b> M                  |
|         |       | V        | A         | 929-938     | 004-A0301                                      | ML <b>V</b> RS <b>V</b> M <b>G</b> GK                  |
|         |       | V        | A         | 930-939     | 005-A0301                                      | L <b>V</b> RS <b>V</b> M <b>G</b> GK <b>Y</b>          |
|         | A2402 | Y        | H         | 886-894     | 007-A2402                                      | L <b>Y</b> PSL <b>I</b> FDI                            |
|         | B1501 | T        | A         | 878-887     | 008-B1501                                      | GVILL <b>T</b> SLLY                                    |
|         | B15   | I        | V         | 946-954     | 055-B15                                        | S <b>I</b> GR <b>W</b> FN <b>T</b> Y                   |
|         | B2705 | R        | K         | 940-949     | 010-B2705                                      | FQ <b>M</b> IL <b>S</b> IG <b>R</b>                    |
|         |       | R        | K         | 948-956     | 009-B2705                                      | GR <b>W</b> FN <b>T</b> Y <b>L</b> Y                   |
|         |       | H        | Y         | 962-971     | 011-B2705                                      | MQ <b>H</b> WAA <b>A</b> GLK                           |
|         | B4402 | I        | V         | 822-831     | 012-B4402                                      | ATL <b>G</b> AG <b>L</b> VL                            |
|         | B44   | I        | V         | 826-835     | 057-B44                                        | AG <b>I</b> L <b>V</b> LF <b>G</b> FF                  |
|         | B5101 | S        | G         | 871-880     | 013-B5101                                      | L <b>A</b> RGS <b>R</b> D <b>G</b> VI                  |
| C03     | L     | M        | 829-838   | 050-C03     | IL <b>V</b> LF <b>G</b> FF <b>T</b> L          |                                                        |
| C04     | V     | I        | 981-990   | 051-C04     | IF <b>S</b> PM <b>E</b> IK <b>V</b> I          |                                                        |
| NS3     | A0101 | Y        | F         | 1442-1450   | 014-A0101                                      | ATD <b>A</b> L <b>G</b> MT <b>Y</b>                    |
|         | A0201 | A        | D         | 1389-1398   | 015-A0201                                      | <b>A</b> LL <b>K</b> GG <b>R</b> H <b>L</b> I          |
|         | A0301 | V        | I         | 1138-1146   | 016-A0301                                      | L <b>V</b> TRD <b>A</b> D <b>V</b> I                   |
|         | B1501 | K        | R         | 1296-1305   | 017-B1501                                      | <b>K</b> L <b>T</b> Y <b>S</b> T <b>Y</b> G <b>K</b> F |
|         | B2705 | L        | I         | 1379-1388   | 018-B2705                                      | I <b>P</b> F <b>Y</b> G <b>K</b> A <b>I</b> <b>P</b> L |
|         |       | V        | I         | 1632-1641   | 019-B2705                                      | Y <b>R</b> L <b>G</b> P <b>V</b> Q <b>N</b> E <b>I</b> |
|         | B4402 | G        | S         | 1407-1416   | 020-B4402                                      | DE <b>I</b> AS <b>K</b> L <b>R</b> G <b>M</b>          |
|         | B4403 | L        | S         | 1639-1647   | 021-B4403                                      | NE <b>I</b> C <b>L</b> TH <b>P</b> I                   |
| B5101   | A     | D        | 1388-1397 | 023-B5101   | <b>I</b> ALL <b>K</b> GG <b>R</b> H <b>L</b>   |                                                        |
| NS4B    | A02   | A        | T         | 1873-1882   | 062-A02                                        | K <b>I</b> M <b>G</b> G <b>E</b> L <b>P</b> T <b>A</b> |
|         |       | A        | T         | 1880-1889   | 065-A02                                        | P <b>T</b> A <b>E</b> D <b>M</b> V <b>N</b> L <b>L</b> |
|         | A0301 | I        | V         | 1901-1910   | 026-A0301                                      | G <b>V</b> IC <b>A</b> IL <b>R</b> R                   |
|         | A2601 | R        | K         | 1852-1861   | 027-A2601                                      | <b>R</b> VLLD <b>I</b> L <b>A</b> G <b>Y</b>           |
|         | A68   | A        | I         | 1736-1744   | 067-A68                                        | E <b>K</b> AL <b>G</b> LL <b>Q</b> R                   |
|         | B27   | R        | K         | 1948-1957   | 061-B27                                        | <b>A</b> R <b>V</b> T <b>A</b> LL <b>S</b> S <b>L</b>  |
|         | B4001 | I        | V         | 1847-1855   | 028-B4001                                      | G <b>I</b> GL <b>R</b> V <b>L</b> L                    |
|         | B51   | A        | T         | 1879-1888   | 066-B51                                        | L <b>P</b> T <b>A</b> E <b>D</b> M <b>V</b> N <b>L</b> |
|         |       | A        | T         | 1881-1889   | 064-B51                                        | <b>T</b> A <b>E</b> D <b>M</b> V <b>N</b> L <b>L</b>   |
| C0401   | V     | I        | 1733-1742 | 025-C0401   | Q <b>F</b> RE <b>K</b> V <b>L</b> G <b>L</b> L |                                                        |
| NS5A    | A0201 | G        | S         | 2321-2330   | 029-A0201                                      | AL <b>P</b> PR <b>G</b> AP <b>P</b> V                  |
|         | A0301 | V, P     | A, S      | 2382-2391   | 030-A0301                                      | <b>K</b> V <b>P</b> PS <b>P</b> GG <b>E</b> S          |
|         | A2601 | D        | G         | 2268-2276   | 033-A2601                                      | ET <b>D</b> A <b>E</b> LS <b>V</b> A                   |
|         | A68   | T        | S         | 1989-1998   | 070-A68                                        | W <b>V</b> C <b>T</b> V <b>L</b> S <b>D</b> FK         |
|         | B0702 | V        | E         | 2309-2317   | 036-B0702                                      | AP <b>D</b> Y <b>V</b> PP <b>T</b> V                   |
|         |       | V        | E         | 2313-2322   | 035-B0702                                      | <b>V</b> PP <b>T</b> V <b>H</b> GC <b>A</b> L          |
|         |       | T        | A         | 2332-2341   | 034-B0702                                      | PP <b>R</b> R <b>K</b> R <b>T</b> I <b>Q</b> L         |
|         | B0801 | I        | V         | 2251-2259   | 037-B0801                                      | E <b>S</b> E <b>T</b> K <b>V</b> V <b>L</b> L          |
| B44     | R     | Q        | 2097-2105 | 071-B44     | VE <b>V</b> R <b>R</b> V <b>G</b> D <b>F</b>   |                                                        |
| NS5B    | A0201 | T        | I         | 2489-2498   | 038-A0201                                      | V <b>L</b> DD <b>H</b> Y <b>K</b> T <b>A</b> L         |
|         |       | N        | D         | 2540-2549   | 040-A0201                                      | SL <b>S</b> S <b>K</b> A <b>I</b> N <b>Q</b> I         |
|         |       | N        | D         | 2544-2552   | 039-A0201                                      | K <b>A</b> I <b>N</b> Q <b>I</b> RS <b>V</b>           |
|         | A1101 | R        | K         | 2500-2509   | 041-A1101                                      | E <b>V</b> K <b>E</b> R <b>A</b> S <b>R</b> V <b>K</b> |
|         | A2601 | K        | R         | 2537-2545   | 042-A2601                                      | D <b>V</b> R <b>S</b> L <b>S</b> S <b>K</b> A          |
|         | B0801 | I        | M         | 2507-2515   | 043-A2601                                      | R <b>V</b> K <b>A</b> R <b>M</b> L <b>T</b> I          |
|         | B1501 | Q        | L         | 2476-2484   | 044-B1501                                      | S <b>Q</b> R <b>Q</b> K <b>V</b> T <b>F</b>            |
|         | B5101 | K        | R         | 2474-2482   | 045-B5101                                      | S <b>A</b> S <b>Q</b> R <b>Q</b> K <b>R</b> V          |

**Table S3: HLA-associated polymorphisms – sequence polymorphisms located *within* the predicted epitope sites.**

HCV viral region, associated HLA type, epitope position, peptide identifier and sequence, as well as wild-type and variant sequences are depicted. Polymorphic sites associated with patient HLA are marked in in bold.

| Protein | HLA   | Wildtype | Variant Residue | Amino Acids | Polymorphic Site | Peptide ID | Predicted Epitope and Wild-type Residue () |
|---------|-------|----------|-----------------|-------------|------------------|------------|--------------------------------------------|
| NS2     | A0201 | I        | V               | 934-942     | 943              | 002-A0201  | VMGGKYFQM ( <b>I</b> )                     |
|         |       | I        | V               | 944-953     | 943              | 003-A0201  | ( <b>I</b> ) ILSIGRWENT                    |
|         | A02   | L        | P               | 861-870     | 871              | 054-A02    | AALQVWVPPL ( <b>L</b> )                    |
|         |       | Y        | H               | 878-886     | 887              | 053-A02    | GVILLTSL ( <b>Y</b> )                      |
| NS3     | A68   | L        | F               | 1047-1056   | 1046             | 058-A68    | ( <b>L</b> ) GTIVTSLTGR                    |
|         | B5101 | A        | D               | 1379-1388   | 1389             | 022-B5101  | IPFYGKAIP ( <b>A</b> )                     |
|         |       | A        | D               | 1390-1398   | 1389             | 024-B5101  | ( <b>A</b> ) QLKGGRHLI                     |
| NSSA    | A1101 | V        | A               | 2374-2382   | 2383             | 031-A1101  | DTQSSTTSK ( <b>V</b> )                     |
|         | A2402 | D        | E               | 2138-2147   | 2148             | 032-A2402  | RYAPPCKPLL ( <b>D</b> )                    |
| NSSB    | B5101 | M        | L               | 2846-2854   | 2855             | 046-B5101  | APTIVWRMV ( <b>M</b> )                     |

**Table S4: HLA-associated polymorphisms – sequence polymorphisms located flanking the predicted epitope sites.**

HCV viral region, associated HLA type, epitope position, peptide identifier and sequence as well as wild-type and variant sequences are depicted. Polymorphic sites flanking epitope are indicated in bold within brackets ().

| Protein core | Position                                | 3a peptide sequence                      | Patient            | Patient viral sequence | CD8/CD4           |     |
|--------------|-----------------------------------------|------------------------------------------|--------------------|------------------------|-------------------|-----|
| core         | 27-51                                   | GGQIVGGVYVLPRRGPRL<br>VYVLPRRGPRLGVRATRK | C58 *              | GGQIVGGVYVLPRRGPRL     | N/A               |     |
|              |                                         |                                          | C106               | VYVLPRRGPRLGVRATRK     |                   |     |
|              | 66-90                                   | PKARRSEGRSWAQPYPW<br>GRSWAQPYPWPPLYGNEG  | S11                | SR                     | ND                | CD4 |
|              |                                         |                                          | C5                 |                        | ND                |     |
|              |                                         |                                          | C12                |                        | PKARRSEGRSWAQPYPW |     |
|              |                                         |                                          | C37                |                        | PKARRSEGRSWAQPYPW |     |
|              |                                         |                                          | 450                |                        | PKARRSEGRSWAQPYPW |     |
|              | 130-147                                 | FADLMGYIPLVGAPVGGV                       | C68 *              | GRSWAQPYPWPPLYGNEG     |                   |     |
|              |                                         |                                          | C15                | FADLMGYIPLVGAPVGGV     |                   | N/A |
|              | 137-154                                 | IPLVGAPVGGVARALAH                        | C5                 | ND                     |                   |     |
| S15          |                                         |                                          | SR                 |                        | N/A               |     |
| 143-158      | PVGGVARALAHGVRAL                        | A16                                      |                    | PVGGVARALAHGVRAL       | CD4               |     |
|              |                                         | C6 *                                     |                    | PAGGVARALAHGVRAL       |                   |     |
|              |                                         | C12                                      |                    | PVGGVARALAHGVRAL       |                   |     |
|              |                                         | C13                                      |                    | PVGGVARALAHGVRAL       |                   |     |
|              |                                         | C18                                      |                    | PVGGVARALAHGVRAL       |                   |     |
|              |                                         | C19                                      |                    | PVGGVARALAHGVRAL       |                   |     |
|              |                                         | C22                                      |                    | PVGGVARALAHGVRAL       |                   |     |
|              |                                         | C23                                      |                    | PVGGVARALAHGVRAL       |                   |     |
|              |                                         | C27                                      |                    | PVGGVARALAHGVRAL       |                   |     |
|              |                                         | 331 *                                    |                    | PVGGVARALAHGVRAL       |                   |     |
| C70          |                                         | PVGGVARALAHGVRAL                         |                    |                        |                   |     |
| C77 *        |                                         | PVGGVARALAHGVRAL                         |                    |                        |                   |     |
| 148-165      | ARALAHGVRALDGINFA                       | C103                                     | ARALAHGVRALDGINFA  | CD8                    |                   |     |
| E2           | 460-476                                 | CKPITFRQGWGSLTDA<br>FRQGWGSLTDANITGSPD   | A15                | CKPITFRQGWGSLTDA       | CD4               |     |
|              |                                         |                                          | C106               | FNQGWGSLTDANI SGPSD    |                   |     |
|              | 610-625                                 | LTPRCMVDYPYRLWHY                         | C106               | LTPRCLVDPYRYRLWHY      | N/A               |     |
|              |                                         |                                          | S1                 | SR                     |                   |     |
|              | 635-650                                 | KVRMFVGGFEHRFTAA                         | S12                | SR                     |                   |     |
|              |                                         |                                          | A11                | KVRMFVGGFEHRFTAA       | N/A               |     |
| 696-719      | LIHLHQNIVDVQYLYGV<br>NIVDVQYLYGVGSGMVGW | C13                                      | KVRMFVAGFEHRFTAA   |                        |                   |     |
|              |                                         | S4 *                                     | SR                 | CD8                    |                   |     |
|              |                                         | A16                                      | NIVDVQYLYGVGSGMVGW |                        |                   |     |
| S9 *         | SR                                      |                                          |                    |                        |                   |     |

**Table S5: HCV genotype-3-specific T-cell targets in HCV structural regions.**

HCV genotype-3-specific T-cell targets identified using overlapping peptide pools in HCV structural regions are depicted. All patients targeting specific individual peptides are specified (colour coding: orange-SR, blue-acute, yellow chronic). Circulating viral sequence is depicted when obtained, as well as CD4+ /CD8+ subset analysis. Sequence polymorphisms differing from overlapping peptide set sequence are marked in red. \* Epitopes previously described in (Humphreys et al. 2012). N/A not available.

| Protein   | Position                               | 3a peptide sequence                     | Patient                 | Patient viral sequence   | CD8/CD4 |
|-----------|----------------------------------------|-----------------------------------------|-------------------------|--------------------------|---------|
| NS2       | 886-896                                | (L)LYPSLIFDI                            | # A8                    | LLYPSLIFDI               | CD8     |
|           |                                        |                                         | # A8                    | LYPSLIFDI                |         |
|           |                                        |                                         | # C1                    | LYPSLIFDI                |         |
|           |                                        |                                         | # C19                   | LYPSLIFDI                |         |
|           |                                        |                                         | # C47                   | LYPSLIFDI                |         |
| # C58     | LYPSLIFDI                              |                                         |                         |                          |         |
| NS2       | 931-940                                | LVRVSMGGKY                              | # S15                   | SR                       | CD8     |
|           | 941-951                                | FQMILSIIGR                              | # A16                   | FQMILSIIGR               | CD8     |
|           |                                        |                                         | # C38                   | FQMILSIIGR               |         |
| # C73     | FQMVILSIIGK                            |                                         |                         |                          |         |
| NS3       | 1040-1062                              | AQQTRGLLGTIVTSLTGR<br>LGTIVTSLTGRDKNVV  | # S15                   | SR                       | N/A     |
|           | 1139-1147                              | LVTRDADVI                               | # S15                   | SR                       | CD8     |
|           | 1198-1213                              | KALQFIPVETLSTQAR                        | S5 *                    | SR                       | N/A     |
|           | 1246-1261                              | KVPAAYVAQGYNVLVL                        | S8 *                    | SR                       | N/A     |
|           | 1264-1281                              | SVAATLGFGSFMGRAYGI                      | A11                     | SVAATLGFGSFMGRAYGI       | N/A     |
|           |                                        |                                         | S6                      | SR                       |         |
|           | 1282-1305                              | DPNIRTGNRTVTGAKL<br>GNRTVTGAKLTYSTYK    | S1 *                    | SR                       | N/A     |
|           |                                        |                                         | S12                     | SR                       |         |
|           | 1370-1387                              | BEVALGSEGEIPFYGKAI                      | A13                     | ND                       | CD8     |
|           | 1379-1387                              | IPFYGKAIFI                              | A13                     | ND                       |         |
|           | A2                                     | ND                                      |                         |                          |         |
|           | 1423-1440                              | AYYRGLDVSVIPTAGDVV                      | C22                     | AYYRGLDVSVIPTAGDVV       | N/A     |
|           |                                        |                                         | S11 *                   | SR                       | CD4     |
|           | 1436-1447                              | GDVVVCATDALMTGF                         | A15                     | GDVVVCATDALMTGY          | CD8     |
|           | 1442-1447                              | ATDALMTGY                               | A15                     | ATDALMTGY                |         |
|           |                                        |                                         | C68                     | ATDALMTGF                |         |
|           |                                        |                                         | C106                    | ATDALMTGF                |         |
| # C108    | ATDALMTGF                              |                                         |                         |                          |         |
| NS3       | 1520-1537                              | RPSGMFDSVVLCECYDA<br>DSVVLCECYDAGCSWYDL | C5                      | ND                       | CD8     |
|           |                                        |                                         | C7                      | RPSGMFDSVVLCECYDAGCSWYDL |         |
|           |                                        |                                         | C15 *                   | RPSGMFDSVVLCECYDAGCSWYDL |         |
|           |                                        |                                         | C17                     | RPSGMFDSVVLCECYDAGCSWYDL |         |
|           |                                        |                                         | C19                     | RPSGMFDSVVLCECYDAGCSWYDL |         |
|           |                                        |                                         | C27 *                   | RPSGMFDSVVLCECYDAGCAWYDL |         |
|           |                                        |                                         | C35                     | ND                       |         |
|           |                                        |                                         | C42                     | ND                       |         |
|           |                                        |                                         | C44                     | RPSGMFDSVVLCECYDAGCSWYDL |         |
|           |                                        |                                         | C58 *                   | RPSGMFDSVVLCECYDAGCSWYDL |         |
|           |                                        |                                         | C96                     | ND                       |         |
| C98       | ND                                     |                                         |                         |                          |         |
| S13       | SR                                     |                                         |                         |                          |         |
| S14       | SR                                     |                                         |                         |                          |         |
| 1547-1569 | RAYLSTPGLPVCQDHLDF<br>GLPVCQDHLDFWESVF | C19                                     | RAYLSTPGLPVCQDHLDFWESVF | N/A                      |         |
| NS4B      | 1792-1808                              | PAVASLMFPTASVTSPL                       | A8                      | ND                       | CD8     |
|           |                                        |                                         | C68 *                   | PAVASLMFPTASVTSPL        |         |
|           |                                        |                                         | C77 *                   | ND                       |         |
|           | 1805-1822                              | TSPLTTNQTMMFFNILGGW                     | S8 *                    | SR                       | N/A     |
|           |                                        |                                         | S13                     | SR                       |         |
|           | 1825-1842                              | THLAGPQSSSAFVVSGLA                      | C77 *                   | ND                       | N/A     |
| 1853-1862 | RVLLDILAGY                             | A16                                     | KVLLDILAGY              | CD8                      |         |
|           |                                        | A4                                      | ND                      |                          |         |
|           |                                        | C5                                      | KVLLDILAGY              |                          |         |
|           |                                        | C52                                     | ND                      |                          |         |
| # C77     | ND                                     |                                         |                         |                          |         |
| 1917-1932 | EGAVQWMNRLIAFASR                       | C67 *                                   | EGAVQWMNRLIAFASR        | CD8                      |         |
| NS5A      | 2030-2047                              | GVMSTRCPGASIAGHVK                       | C13 *                   | GVMSTRCPGASITGHVK        | CD8     |
|           | 2119-2136                              | CPCQVPAEFTTEVDGVR                       | A8                      | CPCQVPAEFTTEVDGVR        |         |
|           | 2126-2141                              | AEFFTEVDGVRLHRYA                        | A13                     | ND                       | CD8     |
|           |                                        |                                         | A15                     | ND                       |         |
| S10       | SR                                     |                                         |                         |                          |         |
| S15       | SR                                     |                                         |                         |                          |         |
| 2145-2162 | KFLLRDEITFMVGLNSYA                     | A5                                      | ND                      | N/A                      |         |
| NS5B      | 2484-2499                              | TFDRLQVLDHYKTAL                         | A13                     | TFDRLQVLDHYKTAL          | CD8     |
|           | 2490-2499                              | VLDHYKTAL                               | # C68                   | ND                       |         |
|           | 2508-2516                              | RVKARMLTI                               | A13                     | RVKARMLTI                | CD8     |
|           | # S10                                  | SR                                      |                         |                          |         |
|           | 2548-2565                              | NQIRSVWEDLLEDTTPI                       | S2 *                    | SR                       | CD4     |
|           | 2603-2618                              | KRALYDVIQKLSIETM                        | S11 *                   | SR                       | CD4     |
|           | 2844-2861                              | IMYAPTIVWRMVMTHFF                       | A4                      | ND                       | N/A     |
|           | 2893-2908                              | IIERLHGLSAFTLHSY                        | S2 *                    | SR                       | CD4     |
|           | 2947-2964                              | GKAKICGLYLFNVAVRTK                      | C37 *                   | GKAKITGLYLFNVAVRTK       | CD8     |
|           | 2967-2976                              | KLTPLPAGQL                              | 450 *                   | KLTPLPAGQLL              | CD8     |

**Table S6: HCV genotype-3-specific T-cell targets in HCV non-structural regions.**

HCV genotype-3-specific T-cell targets identified using overlapping peptide pools and HLA predicted peptides (#) in HCV structural regions are depicted. All patients targeting specific individual peptides are specified (colour coding: orange-SR, blue-acute, yellow chronic). Circulating viral sequence is depicted when obtained, as well as CD4+ /CD8+ subset analysis. Sequence polymorphisms differing from overlapping peptide set sequence are marked in red. \*Epitopes previously described in (Humphreys et al. 2012). N/A not available.

| GT3 CD8+ epitopes (Oxford Study Cohort) |                         |               |         |                                                                                              |                                                                                                                                                                                                                                                                                                                                                                                                                                                                                                                                           | GT1 CD8+ epitopes in corresponding regions                                                       |                                 |                                                                    |
|-----------------------------------------|-------------------------|---------------|---------|----------------------------------------------------------------------------------------------|-------------------------------------------------------------------------------------------------------------------------------------------------------------------------------------------------------------------------------------------------------------------------------------------------------------------------------------------------------------------------------------------------------------------------------------------------------------------------------------------------------------------------------------------|--------------------------------------------------------------------------------------------------|---------------------------------|--------------------------------------------------------------------|
| Position                                | 3a peptide sequence     | Viral protein | HLA     | Pt ID                                                                                        | HLA type                                                                                                                                                                                                                                                                                                                                                                                                                                                                                                                                  | Peptide (Literature)                                                                             | HLA                             | First author                                                       |
| 931-940                                 | LVRVVMGGKY              | NS3           | A03     | S15                                                                                          | A*3201 A*0301 B*1401 B*0702 C*0802 C*0702 #                                                                                                                                                                                                                                                                                                                                                                                                                                                                                               | no CD8 epitopes described                                                                        |                                 |                                                                    |
| 941-951                                 | FQMILLSIGR              | NS2           | B27     | A16<br>C38<br>C73                                                                            | A*0201 A*2601 B*2702 B*3801 C*1203 #<br>A*0201 A*1101 B*1801 B*2705 C*0102 C*1203 #<br>A*0201 B*5701 B*2702 C*0701 C*1501 #                                                                                                                                                                                                                                                                                                                                                                                                               | no CD8 epitopes described                                                                        |                                 |                                                                    |
| 1917-1932                               | EGAVQVMNRLIAFASR        | NS4B          |         | C67                                                                                          | A*0101 A*3001 B*1302 B*4402 C*0602 C*0501 # *                                                                                                                                                                                                                                                                                                                                                                                                                                                                                             | no CD8 epitopes described                                                                        |                                 |                                                                    |
| 2030-2047                               | GVMSTRCPGASIAGHVK       | NS5A          |         | C13                                                                                          | A*1101 A*7401 B*4403 B*38 C*04 C*0702 # *                                                                                                                                                                                                                                                                                                                                                                                                                                                                                                 | no CD8 epitopes described                                                                        |                                 |                                                                    |
| 2484-2499                               | TFDRLQVLDHDKYKAL        | NS5B          |         | A13                                                                                          | A*0101 B*0801 B*5101 C*0102 C*0701 #                                                                                                                                                                                                                                                                                                                                                                                                                                                                                                      | no CD8 epitopes described                                                                        |                                 |                                                                    |
| 2490-2499                               | VLDHDKYKAL              | A02           |         | C68                                                                                          | A*0101 A*0201 B*0801 B*5701 C*0602 C*0701 #                                                                                                                                                                                                                                                                                                                                                                                                                                                                                               |                                                                                                  |                                 |                                                                    |
| 2508-2516                               | RVKARMLTI               | NS5B          | B08     | A13<br>S10                                                                                   | A*0101 B*0801 B*5101 C*0102 C*0701 #<br>A*3201 A*0101 B*0801 B*4402 C*0501 C*0701                                                                                                                                                                                                                                                                                                                                                                                                                                                         | no CD8 epitopes described                                                                        |                                 |                                                                    |
| 2967-2976                               | KLTLPLPAAGQL            | NS5B          |         | 450                                                                                          | # *                                                                                                                                                                                                                                                                                                                                                                                                                                                                                                                                       | no CD8 epitopes described                                                                        |                                 |                                                                    |
| 1853-1862                               | RVLLDLILAGY             | NS4B          | A26     | A16<br>A4<br>C6<br>C52<br>C77                                                                | A*0201 A*2601 B*2702 B*3801 C*120301 #<br>A*0201 A*2601 B*3801 B*4402 C*0501 C*1203 #<br>A*2301 A*2601 B*3801 B*4901 C*0701 C*1203 #<br>A*0101 A*2601 B*4501 B*0801 C*0602 C*0701 #<br>A*0201 A*2601 B*3801 B*2702 C*1203 C*0102 #                                                                                                                                                                                                                                                                                                        | <u>ILAGYAGV</u><br><u>ILAGYAGV</u><br><u>ILAGYAGV</u>                                            | A2<br>A2<br>A2                  | M Battegay<br>N H Gruener<br>T Kuntzen                             |
| 886-896                                 | LLYSLIFDI/LVPSLIFDI     | NS2           | A02/A24 | A8<br>C1<br>C19<br>C47<br>C1<br>C58                                                          | A*2402 A*0201 B*3502 B*4403 C*0401 C*1601 #<br>A*1101 A*2404 B*18 B*3501 C*0401 C*1203 #<br>A*24 B*3501 B*4403 C*0401 C*0409 #<br>A*0205 A*2402 B*1302 B*4901 C*0602 C*0701 #<br>A*0205 A*2402 B*1302 B*4901 C*0602 C*0701 #<br>A*0101 A*0201 B*0702 B*4001 C*0304 C*0702 #                                                                                                                                                                                                                                                               | <u>HTLVFDI</u><br><u>HTLVFDI</u>                                                                 | Class I<br>Class I              | A L Cox<br>T Kuntzen                                               |
| 2947-2964                               | GKAKICGLYLFNVAVRTK      | NS5B          |         | C37                                                                                          | A*1101 B*0702 B*4402 C*0501 C*0702 # *                                                                                                                                                                                                                                                                                                                                                                                                                                                                                                    | <u>GRRAICGRK</u><br><u>GRRAICGRK</u><br><u>GRRAICGRK</u><br><u>KVLFNVAVK</u>                     | Class I<br>B27<br>Class I<br>A2 | C Neumann-Haefelin<br>C Neumann-Haefelin<br>P T F Kennedy<br>Z Guo |
| 148-165                                 | ARALAHGVRALEDGINFA      | core          |         | C103                                                                                         | #                                                                                                                                                                                                                                                                                                                                                                                                                                                                                                                                         | <u>GVRLVDGV</u><br><u>VLEDGVN</u><br><u>VLEDGVN</u>                                              | A2<br>Class I<br>Class I        | H F Lohr<br>D D Anthony<br>K Sugimoto                              |
| 1139-1147                               | LVTRDADVI               | NS3           | A03     | 975                                                                                          | A*3201 A*0301 B*1401 B*0702 C*0802 C*0702 #                                                                                                                                                                                                                                                                                                                                                                                                                                                                                               | <u>VTRDADIV</u>                                                                                  | Class I                         | T Kuntzen                                                          |
| 1520-1537                               | RFSGMDSVVLCRCYDAGCSWYDL | NS3           | B35/C04 | C5<br>C7<br>C15<br>C17<br>C19<br>C27<br>C35<br>C42<br>C44<br>C58<br>C96<br>C98<br>S13<br>S14 | A*1101 A*1101 B*3501 B*5101 C*0401 C*1402<br>A*0101 A*0201 B*35 B*14 C*0401 C*0802<br>A*2402 A*3002 B*0702 B*3501 # *<br>A*1101 A*1101 B*1517 B*3501 C*0401 C*0701<br>A*1101 A*2402 B*18 B*3501 C*0401 C*1203<br>A*0301 A*3002 B*0702 B*3501 C*0401 C*0702 # *<br>A*0101 A*2901 B*3501 B*4403 C*0401 C*1601<br>A*0301 A*2402 B*3501 B*5501 C*0301 C*0401<br>A*2402 B*3501 B*4403 C*0401 C*0409 # *<br>A*0201 A*1101 B*3501 B*4001 C*0401 C*0301<br>A*0301 A*2601 B*3501 B*2701 C*0401 C*0202<br>A*0201 A*1101 B*4402 B*3501 C*0401 C*0501 | <u>MFDSVLCRCYDAGC</u>                                                                            | Class I                         | D Ciuffreda                                                        |
| 2126-2141                               | AEFFTEVDGVRLLHRYA       | NS5A          |         | A13<br>A15<br>S10<br>S15                                                                     | A*0101 B*0801 B*5101 C*0102 C*0701 #<br>A*0101 B*5201 B*5701 C*0602 C*1202<br>A*3201 A*0101 B*0801 B*4402 C*0501 C*0701<br>A*3201 A*0301 B*1401 B*0702 C*0802 C*0702                                                                                                                                                                                                                                                                                                                                                                      | <u>FFTELDGVRLLHREFAP</u>                                                                         | Class I                         | D Ciuffreda                                                        |
| 1792-1808                               | PAVASLMAFTASVTSPL       | NS4B          |         | 6-23<br>C68<br>C77                                                                           | A*2402 A*0201 B*3502 B*4403 C*0401 C*1601<br>A*0101 A*0201 B*0801 B*5701 C*0602 C*0701 # *<br>A*0201 A*2601 B*3801 B*2702 C*1203 C*0102 # *                                                                                                                                                                                                                                                                                                                                                                                               | <u>SIMAFTAAV</u><br><u>SIMAFTAAV</u><br><u>SIMAFTAAV</u>                                         | A2<br>A2<br>A2                  | B Reherrmann<br>K M Chang<br>N H Gruener                           |
| 696-719                                 | LIHLHQNIVDQVYLYGVSGMVGW | E2            |         | S4<br>A16<br>S9                                                                              | A*02 A*3201 B*2707 B*1501 C*0602 C*0304 # *<br>A*0201 A*2601 B*2702 B*3801 C*1203<br># *                                                                                                                                                                                                                                                                                                                                                                                                                                                  | <u>ALSTGLHLHQNIVD</u><br><u>LHQNIVDQVYLYGVG</u>                                                  | Class I<br>Class I              | D Ciuffreda<br>D Ciuffreda                                         |
| 1379-1387                               | IPFYKAIPI               | NS3           | B51     | A13<br>A2                                                                                    | A*0101 B*0801 B*5101 C*0102 C*0701 #<br>B*4403 B*5101 C*1402 C*1601 #                                                                                                                                                                                                                                                                                                                                                                                                                                                                     | <u>IPFYKAI</u><br><u>IPFYKAIPL</u>                                                               | &<br>B51<br>B51                 | S Giugliano<br>D Yerly                                             |
| 1436-1447                               | GDVVCATDALMTGF          | NS3           |         | A15<br>A15                                                                                   | A*0101 B*5201 B*5701 C*0602 C*1202<br>A*0101 B*5201 B*5701 C*0602 C*1202 #                                                                                                                                                                                                                                                                                                                                                                                                                                                                | <u>ATDALMTGY</u><br><u>VATDALMTGY</u>                                                            | A1<br>Class I                   | G M Lauer, 2002<br>A M Werthheimer                                 |
| 1442-1447                               | ATDALMTGY               | A01           |         | C108<br>C106<br>C68                                                                          | A*0101 A*2402 B*0801 B*3906 C*0701 C*0702 #<br>A*0101 A*0301 B*0702 B*0702 C*0702 C*0702 #<br>A*0101 A*0201 B*0801 B*5701 C*0602 C*0701 #                                                                                                                                                                                                                                                                                                                                                                                                 | <u>ATDALMTGF</u><br><u>ATDALMTGF</u><br><u>ATDALMTGY</u><br><u>ATDALMTGY</u><br><u>ATDALMTGY</u> | &<br>A1<br>A1<br>A1<br>A1       | S Giugliano<br>T Kuntzen<br>A L Cox<br>E Barnes<br>G M Lauer, 2004 |

**Table S7: Overlap between genotype-3-specific CD8+ T-cell targets defined in this study and previously described HCV genotype-1-specific CD8+ targets.**

HCV genotype-3-specific CD8+ epitopes and described genotype-1-specific CD8+ epitopes were classified by overlap (left coloured bar): ‘overlapping’ (blue), ‘likely overlapping’ (light blue, <20% sequence differences within targeted area), ‘unlikely overlapping’ (light red, >20% differences within targeted area, or less than 7 amino acids overlap), and ‘not overlapping’ (red). **Left:** For each epitope, viral region, position and genotype-3 sequence is given, as well as patients targeting the epitopes (colour coding: orange-SR, blue-acute, yellow chronic), and patient’s HLA class-I types. **Right:** Published overlapping genotype-1 CD8+ epitopes are specified, including sequence, restricting HLA type and first author of the publication; overlap between epitopes is underlined and genotype-3/genotype-1 sequence differences marked bold. # CD8 restriction for marked patient experimentally defined; \* Epitopes

previously described in (Humphreys et al. 2012); & Epitope previously described for genotype-1 and 3.

(M Battegay et al. 1995; Rehermann et al. 1996; K. M. Chang et al. 1997; Löhr et al. 1999; Grüner et al. 2000; Wertheimer et al. 2003; Sugimoto et al. 2003; Lauer et al. 2004; Cox et al. 2005; Kennedy et al. 2006; Kuntzen et al. 2007; Yerly et al. 2008; Ciuffreda et al. 2008; Giugliano et al. 2009; Neumann-Haefelin et al. 2008; Barnes et al. 2012; Guo et al. 2012)

| GT3 CD4+ epitopes (Oxford Cohort) |                                |               |                                                                                 |                                                                                                                                             |                                                                                                                                | GT1 epitopes described in corresponding regions |                                                                                                                                                                                                                                                                                                                                                                                 |                                                                                                                                            |                                                                                                                                                                                                                                                                    |
|-----------------------------------|--------------------------------|---------------|---------------------------------------------------------------------------------|---------------------------------------------------------------------------------------------------------------------------------------------|--------------------------------------------------------------------------------------------------------------------------------|-------------------------------------------------|---------------------------------------------------------------------------------------------------------------------------------------------------------------------------------------------------------------------------------------------------------------------------------------------------------------------------------------------------------------------------------|--------------------------------------------------------------------------------------------------------------------------------------------|--------------------------------------------------------------------------------------------------------------------------------------------------------------------------------------------------------------------------------------------------------------------|
| Position                          | 3a peptide sequence            | Viral protein | Patient ID                                                                      |                                                                                                                                             |                                                                                                                                | Peptide (Literature)                            | HLA                                                                                                                                                                                                                                                                                                                                                                             | First author                                                                                                                               |                                                                                                                                                                                                                                                                    |
| 453-476                           | CPQRLSSCKPITFFRQGWGSLTDANITGFS | E2            | A15<br>C106                                                                     | DRB1*0701                                                                                                                                   | DRB1*1502                                                                                                                      | #                                               | no CD4 epitopes described                                                                                                                                                                                                                                                                                                                                                       |                                                                                                                                            |                                                                                                                                                                                                                                                                    |
| 2603-2618                         | KRALYDVIQRKLSIETM              | NS5B          | S11                                                                             | DRB1*0404                                                                                                                                   | DRB1*0701                                                                                                                      | # *                                             | KLPLAVMGSYGFQYSPGQR<br>KLPLAVMGSYGFQYSPGQR                                                                                                                                                                                                                                                                                                                                      | Class-II<br>Class-II<br>J Schulze zur Wiesch, 2007<br>C L Day                                                                              |                                                                                                                                                                                                                                                                    |
| 66-90                             | PKARRSEGRSNAQPGYFWPLYGNEG      | core          | C5<br>C12<br>C37<br>450<br>C68                                                  | DRB1*0101<br>DRB1*0301<br>DRB1*0401<br>DRB1*0101                                                                                            | DRB1*0701<br>DRB1*0401<br>DRB1*0407<br>DRB1*0701                                                                               | #<br>#<br># *                                   | RRQPTPKARRPEGR <del>T</del> WAQPG<br>RQPIPKVRRPEGR <del>T</del><br>KVRREPEGR <del>T</del> WAQPG<br>PEGR <del>T</del> WAQPGYFWPLYGNEG<br>PEGR <del>T</del> WAQPGYFWPLYGNEGCGW<br>PEGR <del>T</del> WAQPGYFWP<br>PEGR <del>T</del> WAQPGYFWPL                                                                                                                                     | Class-II<br>HLA-DR<br>HLA-DR<br>Class-II<br>Class-II<br>HLA-DR<br>Class-II                                                                 | J Schulze zur Wiesch, 2012<br>J J Lasarte<br>J J Lasarte<br>J Schulze zur Wiesch, 2007<br>H F Löhr<br>J J Lasarte<br>P T F Kennedy                                                                                                                                 |
| 143-158                           | PVGGVARALAHGVRL                | core          | A16<br>C6<br>C12<br>C13<br>C18<br>C19<br>C22<br>C23<br>C27<br>331<br>C70<br>C77 | DRB1*0801<br>DRB1*0301<br>DRB1*1504<br>DRB1*0301<br>DRB1*0403<br>DRB1*0404<br>DRB1*0701<br>DRB1*0101<br>DRB1*0101<br>DRB1*0101<br>DRB1*0101 | DRB1*1101<br>DRB1*0401<br>DRB1*0701<br>DRB1*1602<br>DRB1*0701<br>DRB1*1104<br>DRB1*0801<br>DRB1*1501<br>DRB1*1501<br>DRB1*1501 | #<br>#<br>#<br>#<br>#<br>#<br>#<br>#<br># *     | ADLMGYIPLVGA <u>PLGCAARA</u><br>ADLMGYIPLVGA <u>PLGCAAR</u><br>ADLMGYIPLVGA <u>PLGCAARA</u><br>LMSGYIPLVGA <u>PLGCAARA</u><br>LVGAP <u>PLGCAARA</u><br>LVGAP <u>PLGCAARALAH</u><br>GAP <u>PLGCAARALAHGVRL</u> ED<br>GAP <u>PLGCAARALAHGVRL</u> ED<br>GAP <u>PLGCAARALAHGVRL</u> ED<br>GAP <u>PLGCAARALAHGVRL</u> ED<br>GG <u>ARALAHGVRL</u><br>ALAHGVRL<br>LAHGVRVLEDGNNYATGNLP | Class-II<br>HLA-DR<br>Class-II<br>Class-II<br>Class-II<br>Class-II<br>Class-II<br>Class-II<br>Class-II<br>Class-II<br>Class-II<br>Class-II | J Schulze zur Wiesch, 2007<br>F A Castelli<br>J Schulze zur Wiesch, 2012<br>D Ciuffreda<br>H F Löhr<br>K Sugimoto<br>J Schulze zur Wiesch, 2007<br>A J MacDonald<br>C L Day<br>J Schulze zur Wiesch, 2012<br>D Ciuffreda<br>H F Löhr<br>J Schulze zur Wiesch, 2012 |
| 1423-1440                         | AYYRGLDVSVIPTAGDVV             | NS3           | C22<br>S11                                                                      | DRB1*0404<br>DRB1*0404                                                                                                                      | DRB1*1104<br>DRB1*0701                                                                                                         | # *                                             | GINAVAYYRGLDVSVIPT <u>SG</u><br>GINAVAYYRGLDVS<br>GINAVAYYRGLDVSVIPT <u>SG</u><br>VAYYRGLDVSVIPT <u>S</u><br>LDVSVIPTSGDVVVVATDAL<br>IPTSGDVVVVSTDALMTG                                                                                                                                                                                                                         | Class-II<br>Class-II<br>Class-II<br>Class-II<br>Class-II<br>Class-II                                                                       | J Schulze zur Wiesch, 2007<br>A M Wertheimer<br>C L Day<br>A M Wertheimer<br>J Schulze zur Wiesch, 2007<br>N M Tabatabai                                                                                                                                           |
| 2548-2565                         | NQIRSVWEDLLEDTTPI              | NS5B          | S2                                                                              | DRB1*0701                                                                                                                                   | DRB1*1454                                                                                                                      | # *                                             | HARKAVT <u>HS</u> INSVKDLLEDN<br>SVWKDLLEDNVPFLDTTMA                                                                                                                                                                                                                                                                                                                            | Class-II<br>Class-II                                                                                                                       | J Schulze zur Wiesch, 2012<br>C L Day                                                                                                                                                                                                                              |
| 2893-2908                         | IIERLHGLSAFTLHSY               | NS5B          | S2                                                                              | DRB1*0701                                                                                                                                   | DRB1*1454                                                                                                                      | # *                                             | PII <u>QRLHGLSAF</u> SLHSYSPG<br>PII <u>QRLHGLSAF</u> SLHSYSPG                                                                                                                                                                                                                                                                                                                  | Class-II<br>Class-II                                                                                                                       | J Schulze zur Wiesch, 2007<br>J Schulze zur Wiesch, 2012                                                                                                                                                                                                           |

**Table S8: Overlap between genotype-3-specific CD4+ T-cell targets defined in this study and previously described HCV genotype-1-specific CD4+ targets.**

HCV genotype-3-specific CD4+ T-cell targets and described genotype-1-specific CD4+ targets and those without defined CD4/CD8 restricted were classified by overlap (left coloured bar): ‘likely overlapping’ (light blue, <20% sequence differences within targeted area), ‘unlikely overlapping’ (light pink, >20% differences within targeted area, or less than 7 amino acids overlap), and ‘not overlapping’ (pink).

**Left:** For each epitope, viral region, position and genotype-3 sequence is given, as well as patients targeting the epitopes (colour coding: orange-SR, blue-acute, yellow chronic), and patient’s HLA class-II types. **Right:** Published overlapping genotype-1 CD8+ epitopes are specified, including sequence, restricting HLA type and first author of the publication; overlap between epitopes is underlined and genotype-3/genotype-1 sequence differences marked bold. # CD4 restriction for marked patient experimentally defined; \* Targets previously described in (Humphreys et al. 2012).

(Lasarte et al. 1998; Lamonaca et al. 1999; Löhr et al. 1999; Tabatabai et al. 1999; Day et al. 2002; MacDonald et al. 2002; Sugimoto et al. 2003; Wertheimer et al. 2003; Kennedy et al. 2006; Castelli et al. 2007; Schulze zur Wiesch et al. 2007; Ciuffreda et al. 2008; Schulze Zur Wiesch et al. 2012).

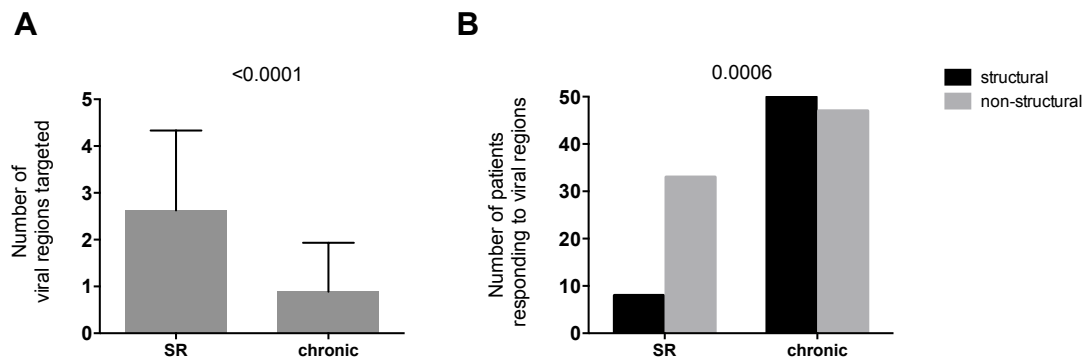

**Figure S1: Comparison of breadth and targeted viral regions in spontaneously resolved individuals and patients with chronic HCV genotype-3 infection.**

(A) Numbers of viral regions targeted in spontaneously resolved HCV infection and chronic HCV genotype-3 infection (unpaired t-test). (B) Comparison of numbers of patients targeting structural and non-structural regions in patient with chronic HCV genotype-3 infection and patients with spontaneously resolved HCV infection (Fisher's exact).

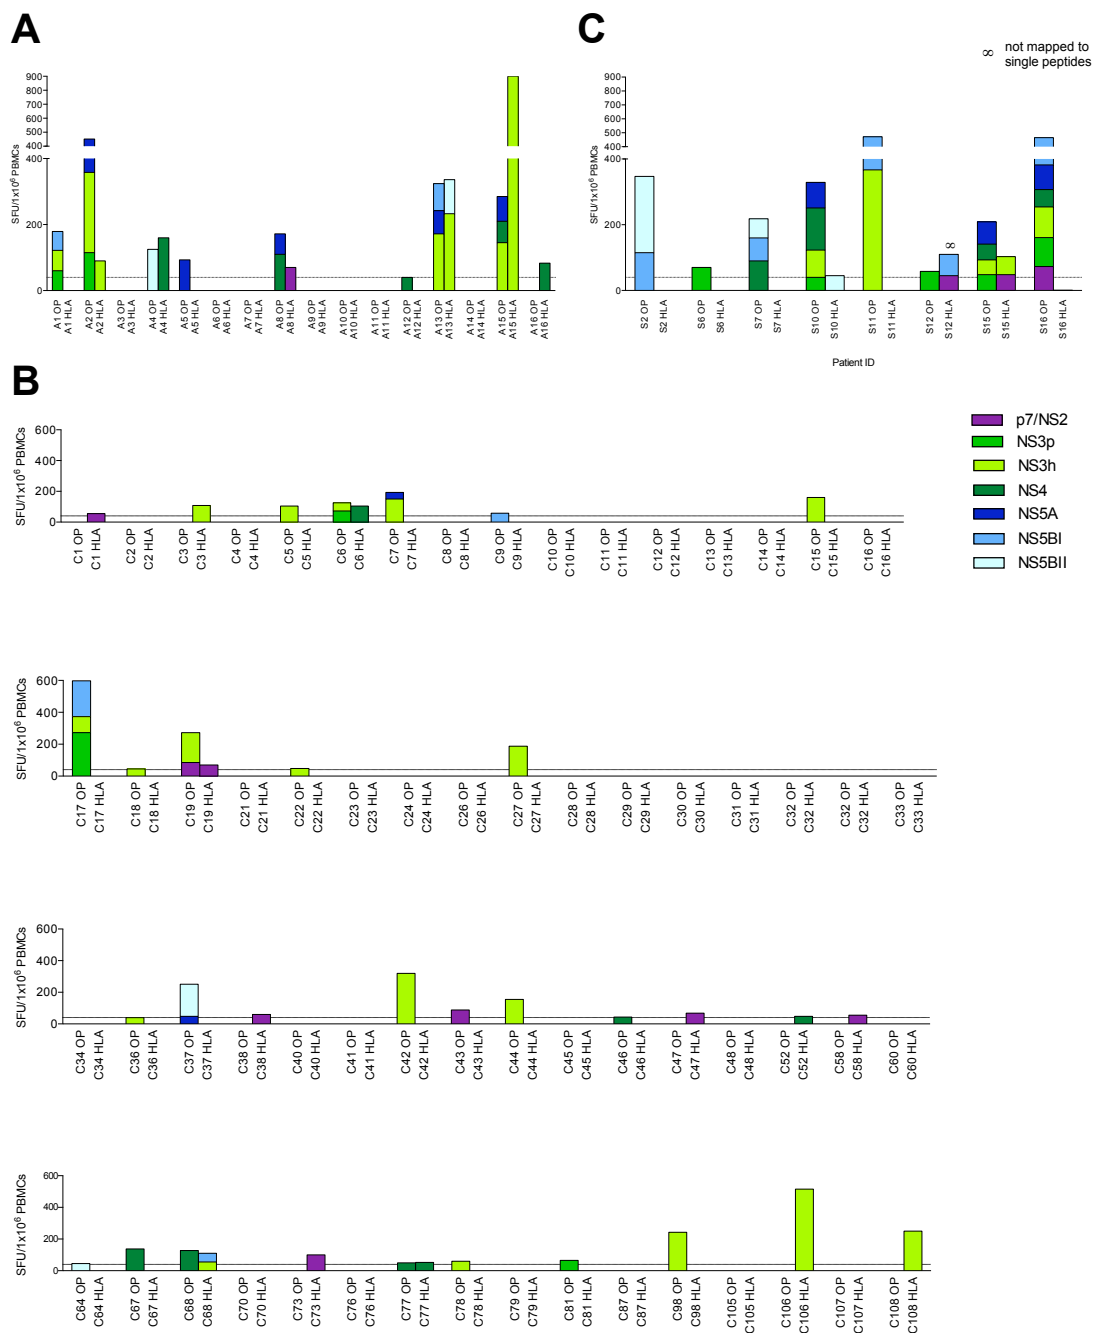

**Figure S2: Comparison of responses to overlapping pools and HLA predicted peptides in acutely and chronically HCV genotype-3 infected patients, and patients with spontaneously resolved infection.**

T-cell responses detected by IFN $\gamma$  ELISpot assay to HLA predicted peptides and overlapping peptide pools (OP) were measured in patients with (A) acutely (n=16) and (B) chronically HCV genotype-3 infected (n=64) patients, and (C) spontaneously resolved infection (n=8). Responses to overlapping pools are compared to the HCV viral region in which the HLA predicted peptide falls (NS3p, NS3h, NS4, NS5a, NS5b1, NS5b2). SFU: Spot forming units.



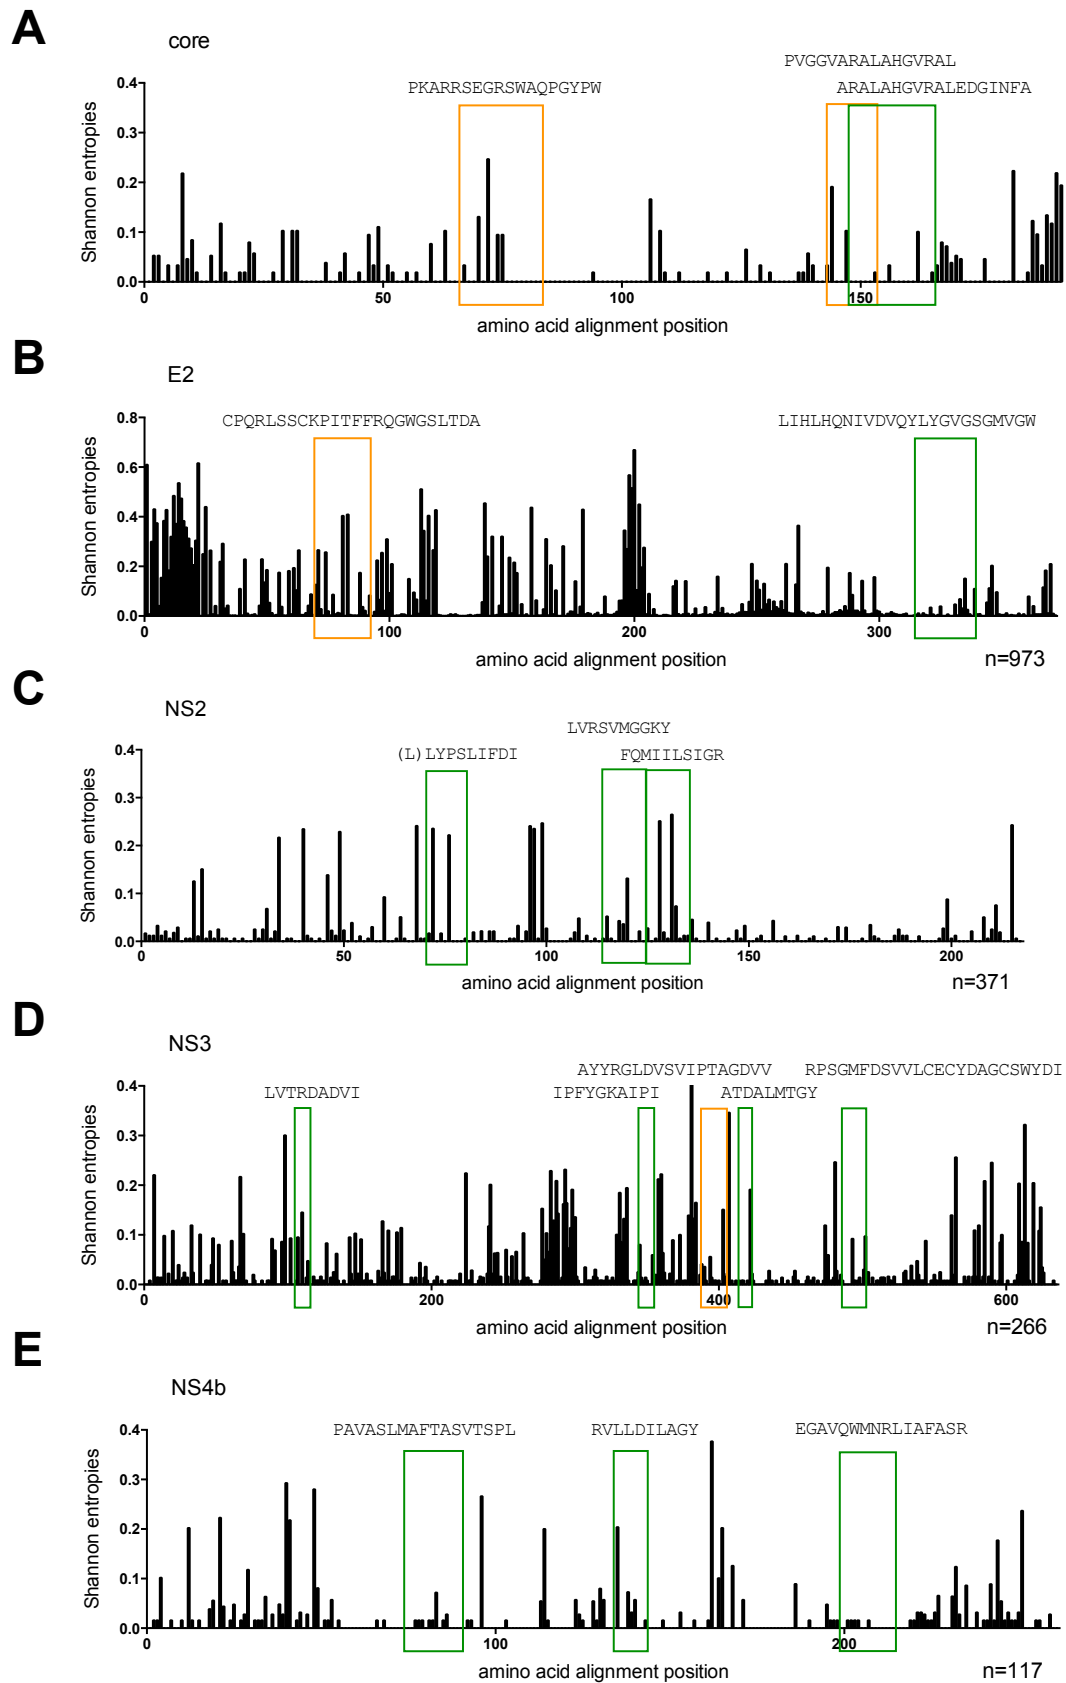

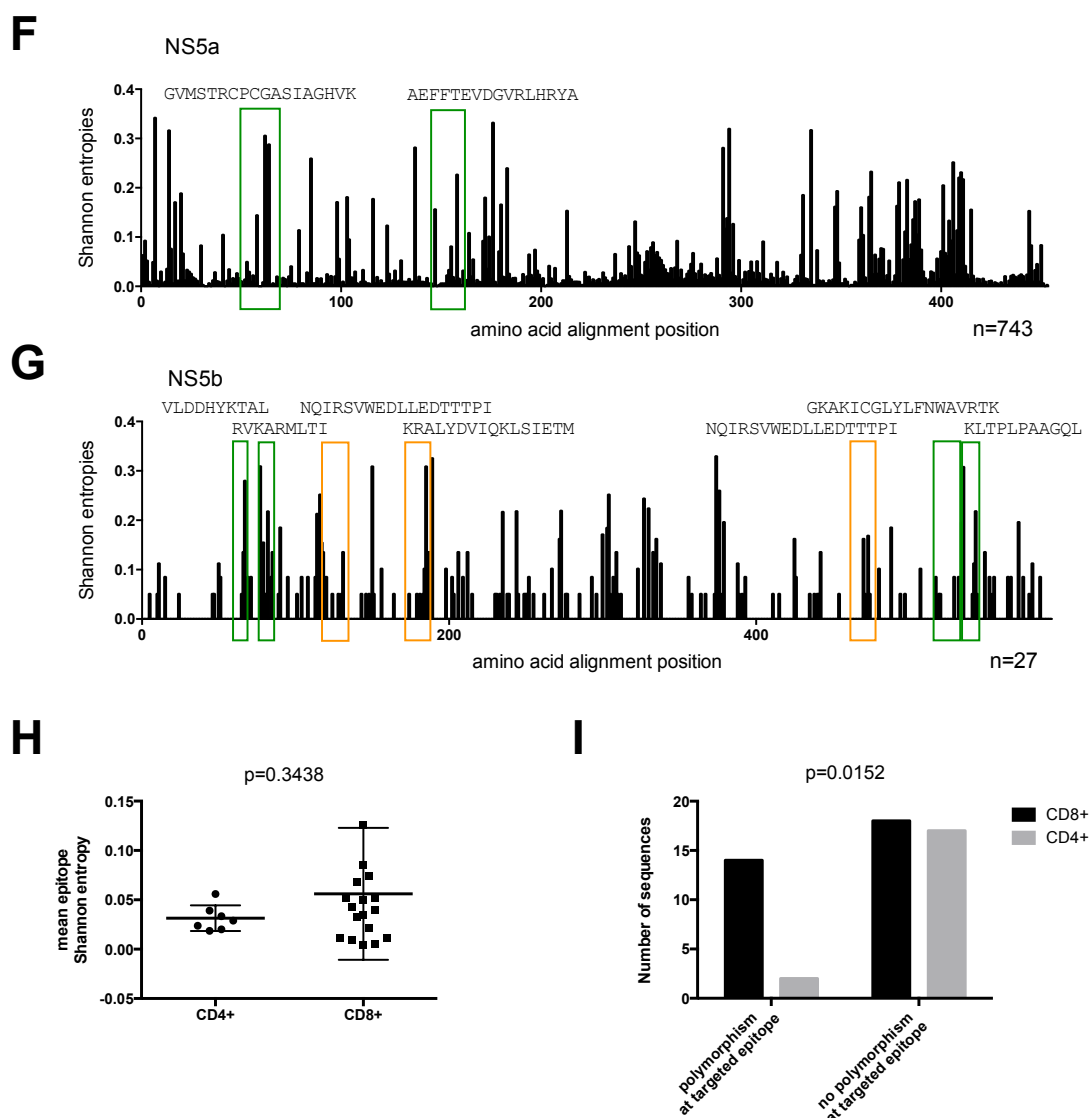

**Figure S3: Evaluation of sequence heterogeneity at targeted HCV genotype-3-specific epitopes.**

Sequence heterogeneity was evaluated by Shannon entropy scores in HCV viral regions (A) core, (B) E2, (C) NS2, (D) NS3, (E) NS4b, (F) NS5a and (G) NS5b on population level using Los Alamos genotype-3 sequences. The number of sequences used for each calculation is given. CD4+ (orange) and CD8+ (green) T-cell targets detected within the Oxford genotype-3 cohort are marked. (H) Mean Shannon entropy scores for CD4+ and CD8+ epitopes were calculated ( $p=0.3438$ , unpaired t-test). (I) Sequence polymorphisms within the Oxford cohort were evaluated at 16 CD8+ and 4 CD4+ T-cell targets in patients with detected T-cell responses. Sequence polymorphisms at CD4+ epitopes were detected in 2/19 sequenced patients, whereas polymorphisms at CD8+ epitopes were detected in 14/32 sequenced patients, respectively ( $p=0.0152$ , Fisher's exact).

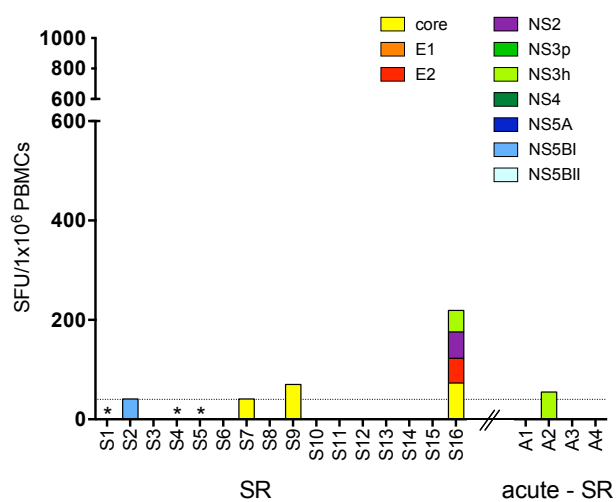

**Figure S4: T-cell responses detected against HCV genotype-1 peptide sets in spontaneously resolved patients and acutely infected patients with subsequent resolution of infection.**

Hepatitis C virus (HCV) genotype-1 specific T-cell responses were measured by IFN $\gamma$ -ELISpot assays (spot-forming units (SFU)/10<sup>6</sup> peripheral blood mononuclear cells (PBMC)) using an HCV genotype-1b-specific peptide set spanning the entire HCV genome in 16 patients with spontaneously resolved infection (SR), and 4 patients acutely infected with HCV genotype-3 who subsequently spontaneously resolved infection (A-SR).

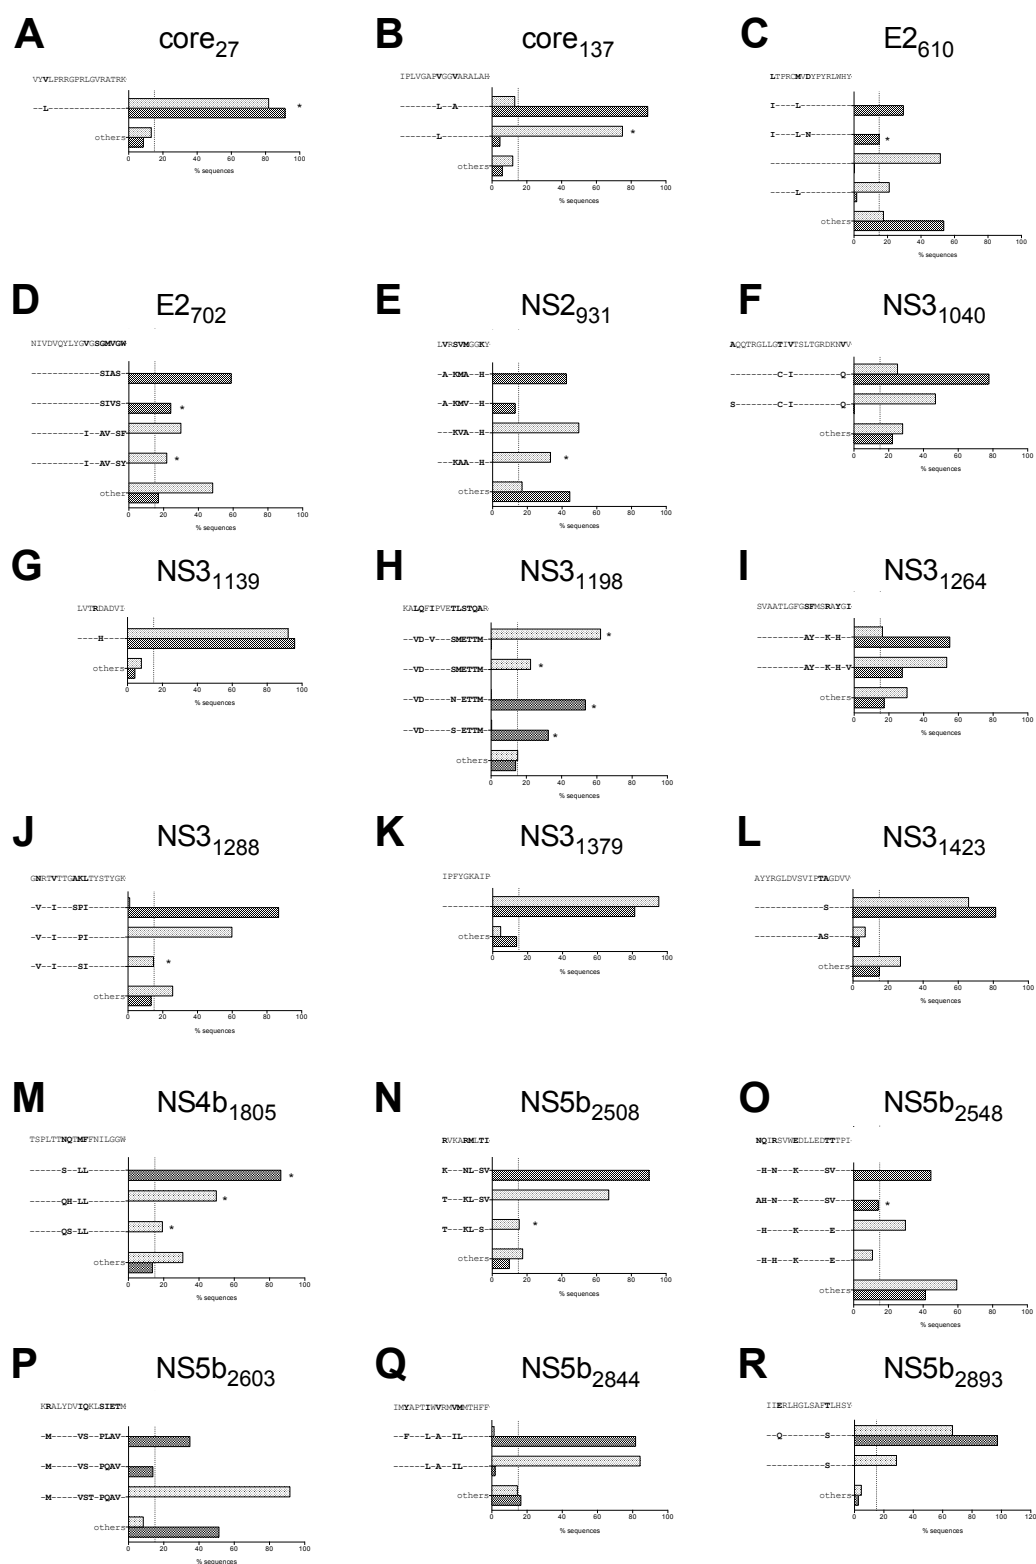

**Figure S5: Hepatitis C virus (HCV) genotype-1 sequences variants at T-cell targets identified in spontaneously resolved patients.**

HCV genotype-1 sequences were obtained from the Los Alamos database at T-cell targets identified in spontaneously resolved patients, to define common HCV genotype-1 sequence variants (frequencies >15%). For each T-cell target (A-R), HCV genotype-3 consensus sequence (top of each graph) and common HCV genotype-1 variants are specified. Where T-cell cross-reactivity to common variants has not been assessed experimentally due to lack of PBMC, sequences are marked with a star.

A

|                                 | Epitope sequence | Viral region                            | start AA | end AA | HLA type | number of publications | T cell targets in Oxford gt3 cohort | Restriction of HCV gt3 epitopes |      |
|---------------------------------|------------------|-----------------------------------------|----------|--------|----------|------------------------|-------------------------------------|---------------------------------|------|
| CD8                             | YLLPRRGPRLL      | core                                    | 35       | 44     | A2       | 10                     |                                     |                                 |      |
|                                 | GPRLGFRAT        | core                                    | 41       | 49     | B7       | 5                      |                                     |                                 |      |
|                                 | NEGLGWGTGW       | core                                    | 87       | 95     | B44      | 5                      |                                     |                                 |      |
|                                 | ADLMGYIPLV       | core                                    | 131      | 140    | A2       | 11                     |                                     |                                 |      |
|                                 | LLALLSCLTV       | core                                    | 178      | 187    | A2       | 5                      |                                     |                                 |      |
|                                 | SMVGNWAKV        | E1                                      | 363      | 371    | A2       | 5                      |                                     |                                 |      |
|                                 | SLLAPGAKQNV      | E2                                      | 401      | 411    | A2       | 5                      |                                     |                                 |      |
|                                 | NTRPPLGNW        | E2                                      | 541      | 549    | B57      | 5                      |                                     |                                 |      |
|                                 | RDWAHNL          | NS2                                     | 957      | 964    | B37      | 7                      |                                     |                                 |      |
|                                 | CINGVCWTV        | NS3                                     | 1073     | 1081   | A2       | 31                     |                                     |                                 |      |
|                                 | LLCPAGHAV        | NS3                                     | 1169     | 1177   | A2       | 5                      |                                     |                                 |      |
|                                 | HPNIEEVAL        | NS3                                     | 1359     | 1367   | B35      | 7                      |                                     |                                 |      |
|                                 | HSKKKDEL         | NS3                                     | 1395     | 1403   | B8       | 8                      |                                     |                                 |      |
|                                 | KLVALGINAV       | NS3                                     | 1406     | 1415   | A2       | 32                     |                                     |                                 |      |
|                                 | ATDALMTGY        | NS3                                     | 1436     | 1444   | A1       | 7                      | +                                   | CD8+                            |      |
|                                 | LLFNILGGWV       | NS4b                                    | 1807     | 1816   | A2       | 7                      |                                     |                                 |      |
|                                 | VLSDFKFWL        | NS4a                                    | 1987     | 1995   | A2       | 7                      |                                     |                                 |      |
|                                 | ALYDVVTKL        | NS5b                                    | 2594     | 2602   | A2       | 11                     |                                     |                                 |      |
|                                 | CD4+             | NKRNTNRRPQDKVFFGGGQIVGGVYLLPRRGPRLL     | core     | 11     | 44       | ND                     | 9                                   |                                 |      |
|                                 |                  | KVRRPEGRRTWAQPGYPWPPLYGNEGLGWAGWLLSPRGS | core     | 67     | 103      | ND                     | 10                                  | +                               | CD4+ |
| ADLMGYIPLVGAPLGGAAARALAHGVRVLED |                  | core                                    | 131      | 160    | ND       | 12                     | +                                   | CD4+                            |      |
| ATRDGKLPATQLRRHIDLL             |                  | E1                                      | 247      | 265    | ND       | 7                      |                                     |                                 |      |
| YFSMVGNWAKVLVVL                 |                  | E1                                      | 361      | 375    | ND       | 6                      |                                     |                                 |      |
| SSDLYLVTRHADVIP                 |                  | NS3                                     | 1127     | 1141   | ND       | 6                      |                                     |                                 |      |
| LETTMRSPVFTDNSSPFVVP            |                  | NS3                                     | 1201     | 1220   | ND       | 6                      |                                     |                                 |      |
| PAAYAQQGYKVLVNLNSVAA            |                  | NS3                                     | 1241     | 1260   | ND       | 8                      |                                     |                                 |      |
| LADAGCSGGAYDIIICDECHSTDAT       |                  | NS3                                     | 1300     | 1324   | ND       | 8                      |                                     |                                 |      |
| EVIKGRHLIFCHSKKCCD              |                  | NS3                                     | 1383     | 1401   | ND       | 9                      |                                     |                                 |      |
| CNTCVTQTVDFSLDPTFT              |                  | NS3                                     | 1454     | 1471   | ND       | 7                      |                                     |                                 |      |
| FWAPCRRPSSMFD                   |                  | NS3                                     | 1501     | 1513   | ND       | 6                      |                                     |                                 |      |
| YELTPAETTVRLRAYMNTFGLPVAQD      |                  | NS3                                     | 1528     | 1553   | ND       | 11                     |                                     |                                 |      |
| THIDAHFLSQT                     |                  | NS3                                     | 1566     | 1577   | ND       | 6                      |                                     |                                 |      |
| ENLPYLVAQATVCAQAQPPPSW          |                  | NS3                                     | 1581     | 1604   | ND       | 10                     |                                     |                                 |      |
| PLLYRLGAVQNEITLTHP              |                  | NS3                                     | 1623     | 1640   | ND       | 8                      |                                     |                                 |      |
| VIVGRVLSGKPAIIPDREV             |                  | NS4a                                    | 1681     | 1700   | ND       | 6                      |                                     |                                 |      |
| GLSTLPGNPAIASL                  |                  | NS4a                                    | 1777     | 1790   | ND       | 6                      |                                     |                                 |      |
| ALVVGVCALILRRHVGPE              |                  | NS4a                                    | 1891     | 1910   | ND       | 6                      |                                     |                                 |      |
| QCCLDPOARVAIKSLTERL             |                  | NS5b                                    | 2661     | 2680   | ND       | 6                      |                                     |                                 |      |

B

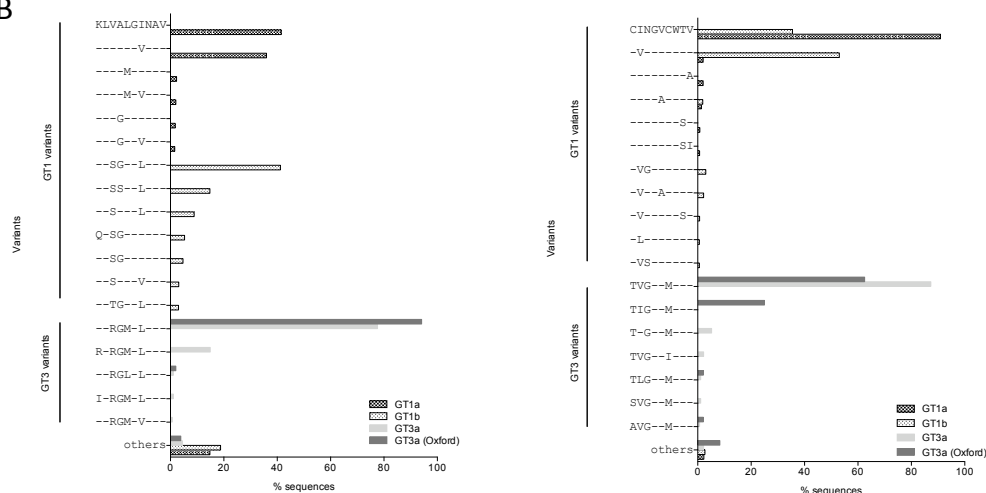

**Figure S6: T-cell targets frequently detected in HCV genotype-1 infection are not targeted in HCV genotype-3 infection, likely due to sequence differences between genotypes.**

(A) Comparison of CD8+ restricted epitopes dominant in HCV genotype-1 infection (defined as described in 5 or more publications on the IEDB). If the epitope was targeted in the Oxford HCV genotype-3 cohort, it is marked with +. Epitopes described as CD4+ restricted epitopes in the Oxford genotype-3 cohort falling into regions of CD8+ restricted epitopes described as HCV genotype-1 epitopes in the literature are marked in grey. (B) Comparison of circulating viral genotype-1 and genotype-3 sequences at dominant HCV genotype-1 epitopes. Sequences were obtained from the Los Alamos database, with additional in-house genotype-3 sequences.

- Barnes, E. et al., 2012. Novel adenovirus-based vaccines induce broad and sustained T cell responses to HCV in man. *Science translational medicine*, 4(115), p.115ra1.
- Battegay, M et al., 1995. Patients with chronic hepatitis C have circulating cytotoxic T cells which recognize hepatitis C virus-encoded peptides binding to HLA-A2.1 molecules. *Journal of virology*, 69(4), pp.2462–2470.
- Castelli, F.A. et al., 2007. Differential capacity of T cell priming in naive donors of promiscuous CD4+ T cell epitopes of HCV NS3 and Core proteins. *European journal of immunology*, 37(6), pp.1513–1523.
- Chang, K.M. et al., 1997. Immunological significance of cytotoxic T lymphocyte epitope variants in patients chronically infected by the hepatitis C virus. *The Journal of clinical investigation*, 100(9), pp.2376–2385.
- Ciuffreda, D. et al., 2008. Polyfunctional HCV-specific T-cell responses are associated with effective control of HCV replication. *European journal of immunology*, 38(10), pp.2665–2677.
- Cox, A.L. et al., 2005. Comprehensive analyses of CD8+ T cell responses during longitudinal study of acute human hepatitis C. *Hepatology*, 42(1), pp.104–112.
- Day, C.L. et al., 2002. Broad Specificity of Virus-Specific CD4+ T-Helper-Cell Responses in Resolved Hepatitis C Virus Infection. *J. Virol.*, 76(24), pp.12584–12595.
- Ge, D. et al., 2009. Genetic variation in IL28B predicts hepatitis C treatment-induced viral clearance. *Nature*, 461(7262), pp.399–401.
- Giugliano, S. et al., 2009. Degree of cross-genotype reactivity of hepatitis C virus-specific CD8+ T cells directed against NS3. *Hepatology (Baltimore, Md.)*, 50(3), pp.707–716.
- Grüner, N.H. et al., 2000. Association of hepatitis C virus-specific CD8+ T cells with viral clearance in acute hepatitis C. *The Journal of Infectious Diseases*, 181(5), pp.1528–1536.
- Guo, Z. et al., 2012. DCs pulsed with novel HLA-A2-restricted CTL epitopes against hepatitis C virus induced a broadly reactive anti-HCV-specific T lymphocyte response. *PloS one*, 7(6), p.e38390.
- Humphreys, I.S. et al., 2012. HCV genotype-3a T cell immunity: specificity, function and impact of therapy. *Gut*. Available at: <http://www.ncbi.nlm.nih.gov/pubmed/22337948> [Accessed May 17, 2012].
- Kennedy, P.T.F. et al., 2006. The influence of T cell cross-reactivity on HCV-peptide specific human T cell response. *Hepatology (Baltimore, Md.)*, 43(3), pp.602–611.
- Kuntzen, T. et al., 2007. Viral Sequence Evolution in Acute Hepatitis C Virus Infection. *J. Virol.*, 81(21), pp.11658–11668.
- Lamonaca, V. et al., 1999. Conserved hepatitis C virus sequences are highly immunogenic for CD4(+) T cells: implications for vaccine development. *Hepatology (Baltimore, Md.)*, 30(4), pp.1088–1098.
- Lasarte, J.J. et al., 1998. Cellular immunity to hepatitis C virus core protein and the response to interferon in patients with chronic hepatitis C. *Hepatology (Baltimore, Md.)*, 28(3), pp.815–822.
- Lauer, G.M. et al., 2004. High resolution analysis of cellular immune responses in resolved and persistent hepatitis C virus infection. *Gastroenterology*, 127(3), pp.924–936.
- Löhr, H.F. et al., 1999. The viral clearance in interferon-treated chronic hepatitis C is associated with increased cytotoxic T cell frequencies. *Journal of hepatology*, 31(3), pp.407–415.
- MacDonald, A.J. et al., 2002. CD4 T Helper Type 1 and Regulatory T Cells Induced against the Same Epitopes on the Core Protein in Hepatitis C Virus-Infected Persons. *Journal of Infectious Diseases*, 185(6), pp.720–727.
- Neumann-Haefelin, C. et al., 2008. Analysis of the evolutionary forces in an immunodominant CD8 epitope in hepatitis C virus at a population level. *Journal of Virology*, 82(7), pp.3438–3451.
- Rehermann, B. et al., 1996. Quantitative analysis of the peripheral blood cytotoxic T lymphocyte response in patients with chronic hepatitis C virus infection. *The Journal of clinical investigation*, 98(6), pp.1432–1440.
- Schulze zur Wiesch, J. et al., 2007. Immunologic evidence for lack of heterologous protection following resolution of HCV in patients with non-genotype 1 infection. *Blood*, 110(5), pp.1559–1569.
- Schulze Zur Wiesch, J. et al., 2012. Broadly directed virus-specific CD4+ T cell responses are primed during acute hepatitis C infection, but rapidly disappear from human blood with viral persistence. *The Journal of experimental medicine*, 209(1), pp.61–75.
- Sugimoto, K. et al., 2003. Suppression of HCV-specific T cells without differential hierarchy demonstrated ex vivo in persistent HCV infection. *Hepatology (Baltimore, Md.)*, 38(6), pp.1437–1448.
- Tabatabai, N.M. et al., 1999. Functionally distinct T-cell epitopes within the hepatitis C virus non-structural 3 protein. *Human immunology*, 60(2), pp.105–115.
- Wertheimer, A.M. et al., 2003. Novel CD4+ and CD8+ T-cell determinants within the NS3 protein in subjects with spontaneously resolved HCV infection. *Hepatology*, 37(3), pp.577–589.
- Yerly, D. et al., 2008. Increased cytotoxic T-lymphocyte epitope variant cross-recognition and functional avidity are associated with hepatitis C virus clearance. *Journal of virology*, 82(6), pp.3147–3153.
